# Supplementary material
Source: publisher site journal article supplement (https://www.dovepress.com/article/221422)
Supplement: Supplementary file 1 [file get_supplementary_file.php]

**Supplementary table 1 The sequence information of primers**

| Primers | Sequence information |
| --- | --- |
| siRNA sequence A | 5′-AGAAACGACAGCAGCGUAAACGUGA-3′ |
| siRNA sequence B | 5′-UGCUUGUACAAGAUAGAAGUUUGCT-3′ |
| siRNA sequence C | 5′-CCAGCUAAUAGUUACAGUACUGAAG-3′ |
| MTDH forward | 5′-AAGCAGTGCAAAACAGTTCACG-3′ |
| MTDH reverse | 5′-GCACCTTATCACGTTTACGCT-3′ |
